CORRECTION

# Correction: Social Value Induction and Cooperation in the Centipede Game

Briony D. Pulford, Eva M. Krockow, Andrew M. Colman, Catherine L. Lawrence

There are errors in the funding section. The correct funding information is as follows: The research reported in this article was supported by the Leicester Judgment and Decision Making Endowment Fund <http://www2.le.ac.uk/departments/psychology/research/JDMSP/leicester-judgment-and-decision-making-endowment-fund> (Grant RM43G0176) to BDP and AMC. BDP is currently an administrator for this funding body. The funding agency had no role in study design, data collection and analysis, decision to publish, or preparation of the manuscript.

## Reference

1. Pulford BD, Krockow EM, Colman AM, Lawrence CL (2016) Social Value Induction and Cooperation in the Centipede Game. PLoS ONE 11(3): e0152352. doi: [10.1371/journal.pone.0152352](https://doi.org/10.1371/journal.pone.0152352) PMID: [27010385](https://pubmed.ncbi.nlm.nih.gov/27010385/)

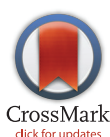

## OPEN ACCESS

**Citation:** Pulford BD, Krockow EM, Colman AM, Lawrence CL (2016) Correction: Social Value Induction and Cooperation in the Centipede Game. PLoS ONE 11(5): e0155364. doi:10.1371/journal.pone.0155364

**Published:** May 5, 2016

**Copyright:** © 2016 Pulford et al. This is an open access article distributed under the terms of the [Creative Commons Attribution License](https://creativecommons.org/licenses/by/4.0/), which permits unrestricted use, distribution, and reproduction in any medium, provided the original author and source are credited.
